# Supplementary material for: A Phase Ib Clinical Trial of Metformin and Chloroquine in Patients with IDH1-Mutated Solid Tumors
Source: MDPI journal article supplement (doi:10.3390/cancers13102474), 2021-05-19
Supplement: s1 [file s1]

# A Phase Ib Clinical Trial of Metformin and Chloroquine in Patients with *IDH1*-Mutated Solid Tumors

Mohammed Khurshed, Remco J. Molenaar, Myra E. van Linde, Ron A. Mathôt, Eduard A. Struys, Tom van Wezel, Cornelis J. F. van Noorden, Heinz-Josef Klumpen, Judith V. M. G. Bovée and Johanna W. Wilmink

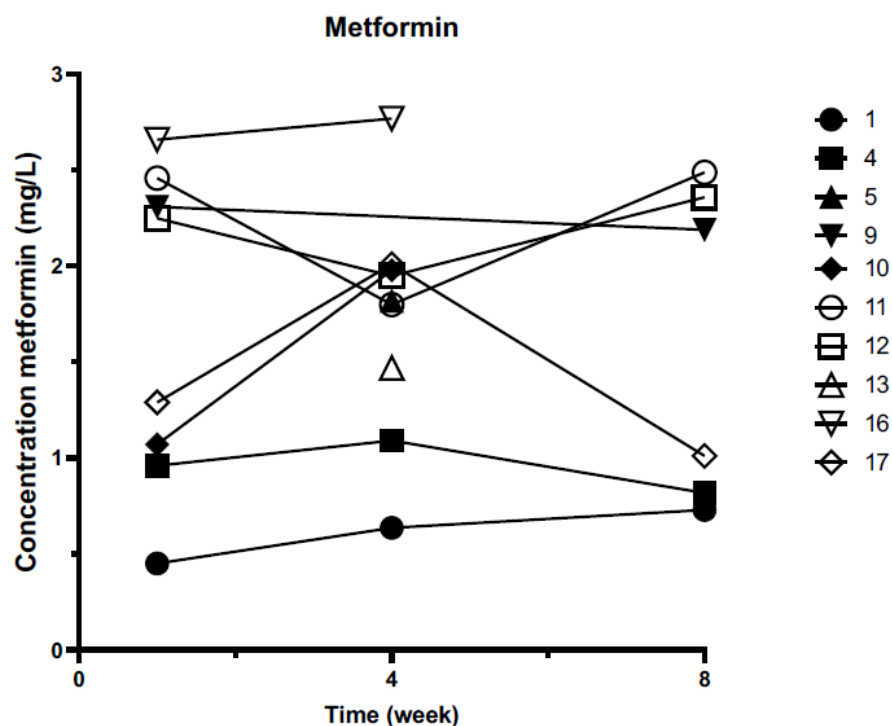

**Figure S1.** Serial metformin serum concentrations of patients in time. The plasma metformin concentration was comparable between single-agent administration (week 4) and co-administration with chloroquine (week 8).

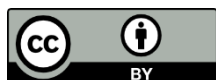

© 2021 by the authors. Licensee MDPI, Basel, Switzerland. This article is an open access article distributed under the terms and conditions of the Creative Commons Attribution (CC BY) license (<http://creativecommons.org/licenses/by/4.0/>).
